# Supplementary material for: Transcriptome Analysis Reveals That NEFA and β-Hydroxybutyrate Induce Oxidative Stress and Inflammatory Response in Bovine Mammary Epithelial Cells
Source: MDPI journal article supplement (doi:10.3390/metabo12111060), 2022-11-02
Supplement: s1 [file s1]

**Table S1.** Primers sequences for real-time quantitative PCR analysis.

| Gene           | Accession number | Primer sequences (5'-3')                           | fragment size (bp) |
|----------------|------------------|----------------------------------------------------|--------------------|
| IL1A           | NM_174092.1      | F:CATAGACGGCAGCCCACCAG<br>R: AGACCCCGGGAGAAGGCAAT  | 232                |
| FOXO3          | XM_005210804.4   | F: CAGGGCAAAGTCAGGTGCCA<br>R: ACCCTGCCTCGTCTGACTGT | 165                |
| BCL10          | NM_001078028.1   | F: GGAGGCGCCACAGTTTGACT<br>R: CGGGAGATGGCGGTTCTTCC | 169                |
| CXCL8          | NM_173925.2      | F: TGGCTGTTGCTCTCTTGGA<br>R: TGCACAACCTTCTGCACCCA  | 256                |
| FAS            | NM_174662.2      | F: CGCCCAGTCATGTCCGACTC<br>R: AGAAGGCAATGGCACCCAC  | 101                |
| SESN3          | XM_024975719.1   | F: TTGCCAGACGAGGGGAGGAA<br>R: CTGCGCAGCATCGTTGTGTC | 196                |
| ID2            | NM_001034231.2   | F: GCTTCCCTCCTCCCAATCGC<br>R: CTGGGCACCAGCTCCTTGAG | 200                |
| C4BPA          | NM_174252.3      | F: AAGGAGGCACGCCTGAAAGG<br>R: AGAGAAGGGCCAGGATGCCA | 133                |
| IRF8           | NM_001083769.2   | F: GGCTACGCTGCGCTTTGAAC<br>R: TCGCCACACTCCATCTCCA  | 178                |
| BOLA-DRA       | NM_001012677.1   | F: TGCCCTGGCCAATATGGCTG<br>R: AACTGATCACGGGTGGGGA  | 183                |
| ADCY5          | NM_001192069.1   | F: GCGCAACGACGAGCTCTACT<br>R: GAGTCATTGAGGCCGAGGC  | 243                |
| TNF- $\alpha$  | NM_173966.3      | F: CGACATCAACTCTCCGGGGC<br>R: GCAATGCGGCTGATGGTGTG | 198                |
| IL-6           | NM_173923.2      | F: CGCTTCACAAGCGCCTTCAC<br>R: TGCCAGTGTCTCCTTGCTGC | 249                |
| IL-1 $\beta$   | NM_174093.1      | F: ACAGCCATGGCAACCGTACC<br>R: CATGGCCACGATGACCGACA | 219                |
| $\beta$ -Actin | NM_173979.3      | F: GGGCAGGTCATCACCATCGG<br>R: TCATTGTGCTGGGTGCCAGG | 244                |
